# Supplementary material for: Evaluation of the Growth, Sporulation, Fungicide Efficacy, and Host Range of Ramularia sphaeroidea
Source: MDPI journal article supplement (doi:10.3390/microorganisms12040766), 2024-04-10
Supplement: s1 [file s1]

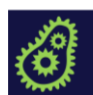

Table S1. Collection details and GenBank accession numbers in this study.

| Species                           | Culture numbers <sup>a</sup> | Host                              | Country     | GenBank accessions <sup>b</sup> |          |          |             |              |               |             | References |
|-----------------------------------|------------------------------|-----------------------------------|-------------|---------------------------------|----------|----------|-------------|--------------|---------------|-------------|------------|
|                                   |                              |                                   |             | ITS                             | LSU      | CmdA     | <i>rpb2</i> | <i>gapdh</i> | <i>tef1-α</i> | <i>his3</i> |            |
| <i>Ramularia ab-scondita</i>      | CBS 114727                   | <i>Arctium</i>                    | Sweden      | KX287307                        | KX287006 | KX289026 | KX288465    | KX288143     | KX287864      | KX288753    | [16]       |
| <i>R. acroptili</i>               | CBS 120252                   | <i>Acroptilon</i>                 | Turkey      | GU214689                        | GU214689 | KX289027 | KX288472    | KX288150     | KX287871      | KX288760    | [16]       |
| <i>R. agastaches</i>              | CPC 10820                    | <i>Agastache</i>                  | South Korea | KX287317                        | KX287016 | KX289029 | KX288476    | KX288154     | KX287875      | KX288764    | [16]       |
|                                   | CPC 10821                    | <i>Agastacherugosa</i>            | South Korea | KX287318                        | KX287017 | KX289030 | KX288477    | KX288155     | KX287876      | KX288765    | [16]       |
| <i>R. archangelicae</i>           | CBS 108992                   | <i>Angelica syl-vestris</i>       | Austria     | KX287329                        | KX287028 | KX289035 | KX288488    | KX288166     | KX287887      | KX288776    | [16]       |
|                                   | CBS 109011                   | <i>Angelica syl-vestris</i>       | Austria     | KX287330                        | KX287029 | KX289036 | KX288489    | KX288167     | KX287888      | KX288777    | [16]       |
| <i>R. asteris</i>                 | CBS 131.21                   | <i>Aster tripolium</i>            | Netherlands | KX287334                        | KX287034 | KX289039 | KX288494    | KX288172     | KX287893      | KX288782    | [16]       |
| <i>R. beticola</i>                | CPC 30065                    | <i>Beta vulgaris</i>              | Denmark     | KX287337                        | KX287037 | KX289040 | KX288496    | KX288175     | KX287896      | KX288785    | [16]       |
|                                   | CPC 30066                    | <i>Beta vulgaris</i>              | France      | KX287338                        | KX287038 | KX289041 | KX288497    | KX288176     | KX287897      | KX288786    | [16]       |
| <i>R. buniadis</i>                | CBS 114301                   | <i>Bunias orientalis</i>          | Sweden      | KX287347                        | KX287047 | KX289048 | KX288506    | KX288185     | KX287906      | KX288795    | [16]       |
| <i>R. calcea</i>                  | CBS 101612                   | <i>Symphytum</i> sp.              | Germany     | KP894219                        | KP894111 | KP894879 | KP894657    | KP894546     | KP894436      | KP894768    | [51]       |
|                                   | CBS 114442                   | <i>Viola hirta</i>                | Sweden      | KP894229                        | KP894122 | KP894884 | KP894668    | KP894557     | KP894447      | KP894779    | [49]       |
| <i>R. carneola</i>                | CBS 108975                   | <i>Scrophularia no-dosa</i>       | Netherlands | KX287348                        | KX287048 | KX289049 | KX288507    | KX288186     | KX287907      | KX288796    | [16]       |
|                                   | CBS 108976                   | <i>Scrophularia no-dosa</i>       | Netherlands | KX287349                        | KX287049 | KX289050 | KX288508    | KX288187     | KX287908      | KX288797    | [16]       |
| <i>R. chamaedryos</i>             | CBS 116577                   | <i>Veronica chamaedrys</i>        | Sweden      | KX287353                        | KX287053 | KX289054 | KX288512    | KX288192     | KX287912      | KX288802    | [16]       |
|                                   | CBS 118794                   | <i>Veronica persica</i>           | New Zealand | KX287356                        | KX287056 | KX289055 | KX288515    | KX288195     | KX287915      | KX288805    | [16]       |
| <i>R. chelidonii</i>              | CPC 12208                    | <i>Hylomecon ver-nalis</i>        | South Korea | KX287358                        | KX287058 | KX289056 | KX288517    | KX288197     | KX287917      | KX288807    | [16]       |
| <i>R. collo-cygni</i>             | CBS 101181                   | <i>Hordeum vul-gare</i>           | Germany     | KJ504786                        | KJ504745 | KJ504513 | KJ504657    | KJ504569     | KJ504701      | KJ504613    | [42]       |
|                                   | CBS 101182                   | <i>Hordeum vul-gare</i>           | Germany     | KX287386                        | KX287086 | KX289058 | KX288544    | KX288224     | KX287945      | KX288834    | [16]       |
| <i>R. coryli</i>                  | CBS 117800                   | <i>Corylus avellana</i>           | Netherlands | KX287391                        | KX287091 | KX289061 | KX288549    | KX288229     | KX287950      | KX288839    | [16]       |
| <i>R. deusta</i>                  | CBS 473.50                   | <i>Lathyrus latifo-lius</i>       | Guadeloupe  | KX287399                        | KX287101 | KX289062 | KX288559    | KX288239     | KX287960      | KX288849    | [16]       |
| <i>R. digitalis-am-biguae</i>     | CBS 434.67                   | <i>Digitalis pur-purea</i>        | Luxembourg  | KX287407                        | KX287109 | KX289063 | KX288566    | KX288247     | KX287968      | KX288856    | [16]       |
| <i>R. endophylla</i>              | CBS 113871                   | <i>Quercus robur</i>              | Netherlands | KP894237                        | KP894130 | KP894891 | KP894677    | KP894566     | KP894455      | KP894787    | [49]       |
|                                   | CBS 113265                   | <i>Quercus robur</i>              | Netherlands | AY490763                        | AY490776 | KF253981 | KP894673    | KP894562     | KF253276      | KP207603    | [50]       |
|                                   | CBS 101680                   | <i>Castanea sativa</i>            | Netherlands | KP894233                        | KP894126 | KP894887 | KP894672    | KP894561     | KP894451      | KP894783    | [49]       |
| <i>R. eucalypti</i>               | CBS 120728;                  | <i>Eucalyptus</i> sp.             | Australia   | KJ504793                        | KJ504751 | KJ504520 | KJ504664    | KJ504576     | KJ504708      | KJ504620    | [42]       |
| <i>R. gei</i>                     | CBS 344.49                   | <i>Geum urbanum</i>               | Netherlands | KX287411                        | KX287113 | KX289064 | KX288570    | KX288251     | KX287972      | KX288860    | [16]       |
|                                   | CBS 113977                   | <i>Geum</i> sp.                   | Sweden      | KX287412                        | KX287114 | KX289065 | KX288571    | KX288252     | KX287973      | KX288861    | [16]       |
| <i>R. geranii</i>                 | CBS 159.24                   | <i>Geranium pyre-naicum</i>       | France      | KX287413                        | KX287115 | KX289066 | KX288572    | KX288253     | KX287974      | KX288862    | [16]       |
|                                   |                              | <i>Geranium syl-vaticum</i>       | France      | KX287414                        | KX287116 | KX289067 | KX288573    | KX288254     | KX287975      | KX288863    | [16]       |
| <i>R. glennii</i>                 | CBS 129441T                  | <i>Human bronchia</i>             | Netherlands | KJ504769                        | KJ504728 | KJ504500 | KJ504640    | KJ504552     | KJ504684      | KJ504596    | [42]       |
|                                   | CBS 122989                   | <i>Human skin</i>                 | Netherlands | KJ504768                        | KJ504727 | KJ504499 | KJ504639    | KJ504551     | KJ504683      | KJ504595    | [42]       |
| <i>R. grevilleana</i>             | CBS 719.84                   | <i>Fragaria × ana-nassa Tioga</i> | New Zealand | EU167605                        | KP894116 | KP894881 | KP894662    | KP894551     | KP894441      | KP894773    | [51]       |
|                                   | CBS 298.34                   | -                                 | Netherlands | KP894223                        | KP894115 | KP894880 | KP894661    | KP894550     | KP894440      | KP894772    | [49]       |
| <i>R. heraclei</i>                | CPC 11505                    | <i>Heracleum moel-lendorffii</i>  | South Korea | KX287423                        | KX287125 | KX289071 | KX288582    | KX288263     | KX287984      | KX288870    | [16]       |
|                                   | CPC 11506                    | <i>Heracleum moel-lendorffii</i>  | South Korea | KX287424                        | KX287126 | KX289072 | KX288583    | KX288264     | KX287985      | KX288871    | [16]       |
|                                   | CPC 11507                    | <i>Heracleum moel-lendorffii</i>  | South Korea | KX287425                        | KX287127 | KX289073 | KX288584    | KX288265     | KX287986      | KX288872    | [16]       |
| <i>R. hydrangeae-macrophyllae</i> | CBS 122273                   | <i>Hydrangea mac-rophylla</i>     | New Zealand | KX287433                        | KX287135 | KX289077 | KX288592    | KX288273     | KX287994      | KX288880    | [16]       |
|                                   | CBS 118410                   | <i>Ligularia clivorum</i>         | New Zealand | KX287435                        | KX287137 | KX289078 | KX288594    | KX288275     | KX287996      | KX288882    | [16]       |
|                                   | CBS 122625                   | <i>Iris</i>                       | New Zealand | KX287437                        | KX287139 | KX289079 | KX288596    | KX288277     | KX287998      | KX288884    | [16]       |
| <i>R. inaequalis</i>              | CPC 15815                    | <i>Taraxacum</i> sp.              | Mexico      | KX287457                        | KX287159 | KX289092 | KX288616    | KX288297     | KX288018      | KX288904    | [16]       |
|                                   | CBS 250.96                   | <i>Taraxacum officinale</i>       | Canada      | KP894224                        | KP894117 | KP894882 | KP894663    | KP894552     | KP894442      | KP894774    | [49]       |
|                                   | CPC 15753                    | <i>Taraxacum officinale</i>       | Canada      | KP894226                        | KP894119 | KP894883 | KP894665    | KP894554     | KP894444      | KP894776    | [49]       |

|                                           |             |                                                   |                |          |          |          |          |          |          |          |            |
|-------------------------------------------|-------------|---------------------------------------------------|----------------|----------|----------|----------|----------|----------|----------|----------|------------|
| <i>R. leonuri</i>                         | CPC 11312   | <i>Leonurus sibiricus</i>                         | South Korea    | KF251331 | KF251835 | KF253983 | KX348080 | KX288303 | KF253178 | KX288910 | [52]       |
|                                           | CPC 11314   | <i>Leonurus sibiricus</i>                         | South Korea    | KX287465 | KX287167 | KX289095 | KX288623 | KX288305 | KX288025 | KX288912 | [16]       |
|                                           | CPC 11411   | <i>Leonurus sibiricus</i>                         | South Korea    | KX287466 | KX287168 | KX289096 | KX288624 | KX288306 | KX288026 | KX288913 | [16]       |
| <i>R. lethalis</i>                        | CBS 141113; | <i>Acer pseudoplatanus</i>                        | Netherlands    | KX287472 | KX287174 | KX289097 | KX288630 | KX288312 | KX288032 | KX288919 | [16]       |
| <i>R. ligustrina</i>                      | CBS 379.52  | <i>Ligustrum vulgare</i>                          | Italy          | KX287473 | KX287175 | KX289098 | KX288631 | KX288313 | KX288033 | KX288920 | [16]       |
| <i>R. mali</i>                            | CBS 129581T | Apple in cold storage                             | Italy          | KJ504778 | KJ504737 | KJ504506 | KJ504649 | KJ504561 | KJ504693 | KJ504605 | [42]       |
| <i>R. malicola</i>                        | CBS 119227  | <i>Malus</i> sp.                                  | USA            | AY598873 | AY598910 | KX289099 | KX288635 | KX288316 | KX288036 | KX288924 | [53]       |
| <i>R. miae</i>                            | CBS 120121  | <i>Wachendorfia thyrsifolia</i>                   | South Africa   | KJ504801 | DQ885902 | KJ504525 | KJ504672 | KJ504584 | KJ504716 | KJ504628 | [42]       |
|                                           | CPC 19770   | <i>Leonotis leonurus</i>                          | South Africa   | KJ504805 | KJ504762 | KJ504528 | KJ504676 | KJ504588 | KJ504720 | KJ504632 | [42]       |
|                                           | CPC 19835   | <i>Gazania rigens</i> var. <i>uniflora</i>        | South Africa   | KJ504804 | KJ504761 | KJ504527 | KJ504675 | KJ504587 | KJ504719 | KJ504631 | [42]       |
| <i>R. neodeusta</i>                       | CPC 13568   | <i>Lathyrus odoratus</i>                          | New Zealand    | KX287478 | KX287180 | KX289100 | KX288637 | KX288318 | KX288038 | KX288926 | [16]       |
|                                           | CBS 141115  | <i>Vicia faba</i>                                 | New Zealand    | KX287479 | KX287181 | KX289101 | KX288638 | KX288319 | KX288039 | KX288927 | [16]       |
| <i>R. helminthiae</i>                     | CPC 11502   | <i>Picris hieracioides</i> var. <i>glabrensis</i> | South Korea    | KX287480 | KX287182 | KX289102 | KX288639 | KX288320 | KX288040 | KX288928 | [16]       |
|                                           | CPC 11504   | <i>Picris hieracioides</i> var. <i>glabrensis</i> | South Korea    | KX287481 | KX287183 | KX289103 | KX288640 | KX288321 | KX288041 | KX288929 | [16]       |
| <i>R. nyssicola</i>                       | CBS 127665  | <i>Nyssa ogeche</i>                               | USA            | KJ504765 | KJ504724 | KJ504496 | KJ504636 | KJ504548 | KJ504680 | KJ504592 | [42]       |
|                                           | CBS 127664  | <i>Nyssa ogeche</i>                               | USA            | KP894231 | KP894124 | KP894885 | KP894670 | KP894559 | KP894449 | KP894781 | [49]       |
| <i>R. osterici</i>                        | CBS 141116  | <i>Ostericum koreanum</i>                         | South Korea    | KX287483 | KX287185 | KX289105 | KX288642 | KX288323 | KX288043 | KX288931 | [16]       |
|                                           | CPC 10751   | <i>Ostericum koreanum</i>                         | South Korea    | KX287484 | KX287186 | KX289106 | KX288643 | KX288324 | KX288044 | KX288932 | [16]       |
|                                           | CPC 10752   | <i>Ostericum koreanum</i>                         | South Korea    | KX287485 | KX287187 | KX289107 | KX288644 | KX288325 | KX288045 | KX288933 | [16]       |
| <i>R. parietariae</i>                     | CBS 123730; | <i>Parietaria officinalis</i>                     | Czech Republic | KX287486 | KX287188 | KX289108 | KX288645 | KX288326 | KX288046 | KX288934 | [16]       |
|                                           | CBS 123731  | <i>Parietaria officinalis</i>                     | Czech Republic | KX287487 | KX287189 | KX289109 | KX288646 | KX288327 | KX288047 | KX288935 | [16]       |
| <i>R. phacae-frigidiae</i>                | CBS 234.55  | <i>Phaca frigida</i>                              | Switzerland    | KP894232 | KP894125 | KP894886 | KP894671 | KP894560 | KP894450 | KP894782 | [49]       |
| <i>R. plurivora</i>                       | CBS 118743T | Human bone marrow                                 | Netherlands    | KJ504780 | KJ504739 | KJ504508 | KJ504651 | KJ504563 | KJ504695 | KJ504607 | [42]       |
|                                           | CPC 16123   | Melon in storage                                  | Netherlands    | KJ504782 | KJ504741 | KJ504510 | KJ504653 | KJ504565 | KJ504697 | KJ504609 | [42]       |
| <i>R. pratensis</i> var. <i>pratensis</i> | CBS 122105  | <i>Rumex</i> sp.                                  | Taiwan         | KX287488 | KX287190 | KX289110 | KX288647 | KX288328 | KX288048 | KX288936 | [16]       |
| <i>R. rubella</i>                         | CPC 15748   | <i>Rumex obtusifolius</i>                         | New Zealand    | KX287496 | KX287198 | KX289111 | KX288656 | KX288336 | KX288056 | KX288945 | [16]       |
|                                           | CBS 114440  | <i>Rumex longifolius</i>                          | Sweden         | KX287497 | KX287199 | KX289112 | KX288657 | KX288337 | KX288057 | KX288946 | [16]       |
| <i>R. rumicicola</i>                      | CBS 141118  | <i>Rumex crispus</i>                              | South Korea    | KX287503 | KX287205 | KX289115 | KX288663 | KX288344 | KX288064 | KX288953 | [16]       |
| <i>R. rumicis</i>                         | CBS 114300  | <i>Rumex aquaticus</i>                            | Sweden         | KJ504787 | KJ504746 | KJ504514 | KJ504658 | KJ504570 | KJ504702 | KJ504614 | [42]       |
| <i>R. vizellae</i>                        | CBS 115981  | <i>Malus</i> dead leaf litter                     | Netherlands    | KP894283 | KP894176 | KP894928 | KP894722 | KP894611 | KP894501 | KP894833 | [49]       |
|                                           | CBS 115982  | <i>Malus</i> dead leaf litter                     | Netherlands    | KP894284 | KP894177 | KP894929 | KP894723 | KP894612 | KP894502 | KP894834 | [49]       |
|                                           | CBS 117871  | <i>Quercus rubra</i>                              | Netherlands    | KP894295 | KP894188 | KP894939 | KP894734 | KP894623 | KP894513 | KP894845 | [49]       |
| <i>R. stellariicola</i>                   | CBS 130592  | <i>Stellaria aquatica</i>                         | South Korea    | GU214693 | KX287216 | KX289117 | KX288673 | KX288355 | KX288076 | KX288965 | [44]       |
| <i>R. tovarae</i>                         | CBS 113305  | <i>Polygonum filiforme</i>                        | South Korea    | KJ504807 | KJ504764 | KJ504529 | KJ504678 | KJ504590 | KJ504722 | KJ504634 | [42]       |
| <i>R. tricherae</i>                       | CBS 108973  | <i>Knautia arvensis</i>                           | Netherlands    | KP894249 | KP894142 | KP894902 | KP894688 | KP894577 | KP894467 | KP894799 | [49]       |
| <i>R. vizellae</i>                        | CBS 117871  | <i>Quercus rubra</i>                              | Netherlands    | KP894295 | KP894188 | KP894939 | KP894734 | KP894623 | KP894513 | KP894845 | [49]       |
| <i>R. unterseheri</i>                     | CBS 124846  | <i>Fagus sylvatica</i>                            | Germany        | KP894267 | KP894160 | KP894920 | KP894706 | KP894595 | KP894485 | KP894817 | [49]       |
| <i>R. sphaeroidea</i>                     | YN1931401   | <i>Vicia villosa</i>                              | China          | MW092181 | OM945870 | OM981227 | OM981230 | MW448178 | MW448172 | MW448175 | This study |
| <i>R. sphaeroidea</i>                     | YN1931402   | <i>Vicia villosa</i>                              | China          | MW332205 | OM945871 | OM981228 | OM981231 | MW448179 | MW448173 | MW448177 | This study |
| <i>R. sphaeroidea</i>                     | YN1931403   | <i>Vicia villosa</i>                              | China          | MW332206 | OM945872 | OM981229 | OM981232 | MW448180 | MW448174 | MW448177 | This study |
| <i>R. sphaeroidea</i>                     | CBS 112891  | <i>Vicia villosa</i>                              | USA            | AY352584 | KX287215 | KX289117 | KX288673 | KX288354 | KX288074 | KX288963 | [14]       |
| <i>R. vallisumbrosae</i>                  | CBS 271.38  | <i>Narcissus Victoria</i>                         | UK             | KX287239 | KX287224 | KX289121 | KX288698 | KX288378 | KX288098 | KX288988 | [16]       |

|                                    |            |                      |             |          |          |          |          |          |          |          |      |
|------------------------------------|------------|----------------------|-------------|----------|----------|----------|----------|----------|----------|----------|------|
| <i>R. urticae</i>                  | CBS 105.26 | <i>Urtica dioica</i> | Sweden      | KP894276 | KP894168 | KP894926 | KP894714 | KP894604 | KP894494 | KP894826 | [49] |
| <i>Mycosphaerelloides madeirae</i> | CBS 116066 | <i>Quercus robur</i> | Netherlands | AY853188 | KX286989 | KX289024 | KX288444 | KX288139 | KX287855 | KX288747 | [49] |

a Culture numbers in bold represent ex-type specimens. MHLZU, Mycological Herbarium of Lanzhou University. b ITS = internal transcribed spacer 1 and 4 together with 5.8S nrRNA; LSU = partial 28S nrRNA gene; CmdA = calmodulin gene; rpb2 = RNA polymerase II second largest subunit; gapdh = glyceraldehyde-3-phosphate dehydrogenase gene; tef1- $\alpha$  = translation elongation factor 1- $\alpha$  gene; and his3 = histone H3 gene.

## Reference

14. Koike, S.T.; Smith, R.F.; Crous, P.W.; Groenewald, J.Z. Leaf and stem spot caused by *Ramularia sphaeroidea* on purple and lana woollypod vetch (*Vicia* spp.) cover crops in California. *Plant Dis.* **2004**, *88*, 221–221. <https://doi.org/10.1094/Pdis.2004.88.2.221b>.
16. Videira, S.; Groenewald, J.Z.; Braun, U.; Shin, H.D.; Crous, P.W. All that glitters is not *Ramularia*. *Study Mycol.* **2016**, *83*, 49–163. <https://doi.org/10.1016/j.simyco.2016.06.001>.
42. Videira, S.; Groenewald, J.Z.; Kolečka, A.; Haren, L.V.; Boekhout, T.; Crous, P.W. Elucidating the *Ramularia eucalypti* species complex. *Persoonia* **2015**, *34*, 50–64. <https://doi.org/10.3767/003158515X685670>.
49. Videira, S.I.R.; Groenewald, J.Z.; Verkley, G.J.M.; Braun, U.; Crous, P.W. The rise of *Ramularia* from the *Mycosphaerella labyrinth*. *Fungal Biol.* **2015**, *119*, 823–843. <https://doi.org/10.1016/j.funbio.2015.06.003>.
50. Verkley, G.J.; Crous, P.W.; Groenewald, J.E.; Braun, U.; Aptroot, A. *Mycosphaerella punctiformis* revisited: Morphology, phylogeny, and epitypification of the type species of the genus *Mycosphaerella* (Dothideales, Ascomycota). *Mycol. Res.* **2004**, *108*, 1271–1282. <https://doi.org/10.1017/S0953756204001054>.
51. Simon, U.K.; Groenewald, J.Z.; Crous, P.W. *Cymadothea trifolii*, an obligate biotrophic leaf parasite of *Trifolium*, belongs to Mycosphaerellaceae as shown by nuclear ribosomal DNA analyses. *Persoonia-Mol. Phylogeny Evol. Fungi* **2009**, *22*, 49–55. <https://doi.org/10.3767/003158509X425350>.
52. Verkley, G.J.M.; Quaedvlieg, W.; Shin, H.D.; Crous, P.W. A new approach to species delimitation in *Septoria*. *Stud. Mycol.* **2013**, *75*, 213–305. <https://doi.org/10.3114/sim0018>.
53. Esra, G.Ü.L.; Karatas, Z.; Karakaya, A. Evaluation of the fungicide resistance of gray mold (*Botrytis cinerea*) in tomatoes to boscalid and pyraclostrobin in greenhouse areas of Turkey. *J. Agric. Sci.* **2021**, *31*, 487–493. <https://doi.org/10.29133/yyutbd.820029>.
